# Supplementary material for: Temperature overshoot responses to ambitious forestation in an Earth System Model
Source: Springer Nature journal article supplement (doi:10.1038/s41467-024-52508-x), 2024-09-19
Supplement: 41467_2024_52508_MOESM3_ESM.pdf [file 41467_2024_52508_MOESM3_ESM.pdf]

## **Description of Additional Supplementary Files**

**File Name: Supplementary Data 1**

**Description:** Excel spreadsheet that contains the detailed compiled list of past literature estimates on sequestration potentials.
